# Supplementary material for: Biodegradation of Pine Processionary Caterpillar Silk Is Mediated by Elastase- and Subtilisin-like Proteases
Source: MDPI journal article supplement (doi:10.3390/ijms232315253), 2022-12-03
Supplement: s1 [file s1]

**Supplementary Material. Table S1.** List of proteases/peptidases deduced from the annotated genome of *B. licheniformis* IIVV3 sorted by their putative cellular location determined by *in silico* analysis and according to their homology with proteins present in databases (NCBI id). (EXT: extracellular; CW: cell wall)

| Number | Protein                                   | Annotation                                                     | Cellular location | NCBI id  |
|--------|-------------------------------------------|----------------------------------------------------------------|-------------------|----------|
| 1      | NODE_1_length_1554326_cov_186.887576_25   | Glutathione hydrolase proenzyme (peptidase)                    | EXT               | P54422.1 |
| 2      | NODE_1_length_1554326_cov_186.887576_436  | Bacillopeptidase F (Ser-endopeptidase)                         | EXT               | P16397.2 |
| 3      | NODE_1_length_1554326_cov_186.887576_437  | Bacillopeptidase F (Ser- endopeptidase)                        | EXT               | P16397.2 |
| 4      | NODE_1_length_1554326_cov_186.887576_788  | Minor extracellular protease Epr (Ser-endopeptidase)           | EXT               | P16396.1 |
| 5      | NODE_1_length_1554326_cov_186.887576_1020 | Ser-type D-Alal-D-Ala carboxypeptidase DacC                    | EXT               | P39844.1 |
| 6      | NODE_1_length_1554326_cov_186.887576_1387 | Ser type D-alanyl-D-alanine carboxypeptidase DacF              | EXT               | P38422.2 |
| 7      | NODE_1_length_1554326_cov_186.887576_1542 | Uncharacterized protein YqgT (metallopeptidase)                | EXT               | P54497.1 |
| 8      | NODE_2_length_1039096_cov_242.662227_247  | Aminopeptidase YwaD (metallopeptidase)                         | EXT               | P25152.2 |
| 9      | NODE_2_length_1039096_cov_242.662227_302  | Minor extracellular protease vpr (Ser-endopeptidase)           | EXT               | P29141.1 |
| 10     | NODE_2_length_1039096_cov_242.662227_483  | Gamma-DL-glutamyl hydrolase (Cys-type peptidase)               | EXT               | P96740.2 |
| 11     | NODE_2_length_1039096_cov_242.662227_552  | Peptidoglycan DL-endopeptidase CwlO (Cys-type peptidase)       | EXT               | P40767.2 |
| 12     | NODE_3_length_407695_cov_224.282661_74    | Probable peptidoglycan endopeptidase LytE (Cys-type peptidase) | EXT               | P54421.1 |
| 13     | NODE_3_length_407695_cov_224.282661_181   | Subtilisin Carlsberg (Ser-endopeptidase)                       | EXT               | P00780.2 |
| 14     | NODE_3_length_407695_cov_224.282661_195   | Minor extracellular protease Epr (Ser-endopeptidase)           | EXT               | P16396.1 |
| 15     | NODE_4_length_387490_cov_255.809181_217   | Peptidoglycan DL-endopeptidase CwlO (Cys-type peptidase)       | EXT               | Q65NQ9.1 |
| 16     | NODE_4_length_387490_cov_255.809181_224   | Glutamyl endopeptidase (Ser- endopeptidase)                    | EXT               | P80057.2 |
| 17     | NODE_6_length_190288_cov_236.934286_18    | Carboxypeptidase 2 (metallocarboxypeptidase)                   | EXT               | C5FYJ7.1 |
| 18     | NODE_7_length_162504_cov_206.833098_93    | Cell wall-associated protease (Ser-endopeptidase)              | EXT               | P54423.2 |
| 19     | NODE_7_length_162504_cov_206.833098_122   | Extracellular serine protease (Ser-endopeptidase)              | EXT               | P09489.1 |
| 20     | NODE_13_length_20122_cov_320.430308_3     | Ser-type D-alanyl-D-alanine carboxypeptidase DacA              | EXT               | P08750.3 |
| 21     | NODE_1_length_1554326_cov_186.887576_60   | Cys-type Gamma-D-glutamyl-L-lysine dipeptidyl-peptidase        | CW                | O35010.2 |
| 22     | NODE_1_length_1554326_cov_186.887576_582  | Uncharacterized zinc protease YmxG (Metalloendopeptidase)      | CW                | Q04805.3 |
| 23     | NODE_1_length_1554326_cov_186.887576_1157 | D-gamma-glutamyl-meso-diaminopimelic acid (Cys-type peptidase) | CW                | O31852.1 |
| 24     | NODE_1_length_1554326_cov_186.887576_1482 | SpoIVB peptidase (Ser-peptidase)                               | CW                | P17896.2 |
| 25     | NODE_1_length_1554326_cov_186.887576_1708 | Probable endopeptidase YddH (Cys-type peptidase)               | CW                | P96645.1 |
| 26     | NODE_2_length_1039096_cov_242.662227_892  | L-Ala--D-Glu endopeptidase (metalloendopeptidase)              | CW                | O32130.2 |
