# Supplementary material for: Biodegradation of Pine Processionary Caterpillar Silk Is Mediated by Elastase- and Subtilisin-like Proteases
Source: MDPI journal article supplement (doi:10.3390/ijms232315253), 2022-12-03
Supplement: s1 [file s1]

**Supplementary Material. Table S3.** List of proteases/peptidases deduced from the annotated genome of *P. aeruginosa* IIVV-SD1 sorted by their cellular location determined by *in silico* analysis and according to their homology with proteins present in databases (NCBI id). (EXT: extracellular; COM: cell outer membrane; CW: cell wall; PER: periplasmic space)

| Number | Protein                                  | Annotation                                                      | Cellular location | NCBI id  |
|--------|------------------------------------------|-----------------------------------------------------------------|-------------------|----------|
| 1      | NODE_1_length_899382_cov_187.066277_563  | Aeruginolysin (Alkaline metalloprotease)                        | EXT               | Q03023.1 |
| 2      | NODE_2_length_679634_cov_194.253327_356  | Protease LasB (elastase, metalloendopeptidase)                  | EXT               | P14756.1 |
| 3      | NODE_2_length_679634_cov_194.253327_562  | Extracellular serine protease (Ser-endopeptidase)               | EXT               | P09489.1 |
| 4      | NODE_3_length_664803_cov_198.377296_440  | Carboxy-terminal-processing protease (Ser-endopeptidase)        | EXT               | Q44879.1 |
| 5      | NODE_5_length_443323_cov_188.588754_15   | Secernin-2 (Cys-type exopeptidase)                              | EXT               | Q96FV2.3 |
| 6      | NODE_6_length_372047_cov_188.095835_4    | Protease LasA (elastase, metalloendopeptidase)                  | EXT               | Q02L18.1 |
| 7      | NODE_8_length_305527_cov_190.385250_184  | Aminopeptidase (metalloexopeptidase)                            | EXT               | Q02PA2.1 |
| 8      | NODE_12_length_204530_cov_195.990434_158 | Lysyl endopeptidase (Ser- peptidase)                            | EXT               | Q02SZ7.1 |
| 9      | NODE_21_length_68114_cov_204.118177_73   | Immunomodulating metalloprotease (metallopeptidase)             | EXT               | Q9I5W4.1 |
| 10     | NODE_1_length_899382_cov_187.066277_297  | Porin D (Ser-peptidase)                                         | COM               | P32722.1 |
| 11     | NODE_3_length_664803_cov_198.377296_439  | Murein hydrolase activator EnvC (metalloendopeptidase)          | COM/PER           | P37690.2 |
| 12     | NODE_4_length_512579_cov_183.410353_265  | Porin D (Ser-peptidase)                                         | COM               | P32722.1 |
| 13     | NODE_4_length_512579_cov_183.410353_343  | Porin D (Ser-peptidase)                                         | COM               | P32722.1 |
| 14     | NODE_4_length_512579_cov_183.410353_373  | Peptidyl-Asp metalloendopeptidase                               | COM               | Q9I060.1 |
| 15     | NODE_5_length_443323_cov_188.588754_300  | Porin D (Ser-peptidase)                                         | COM               | P32722.1 |
| 16     | NODE_7_length_323476_cov_190.432708_185  | Tail-specific protease (Ser-endopeptidase)                      | COM/PER           | P43669.2 |
| 17     | NODE_10_length_241591_cov_199.467996_116 | Porin D (Ser-peptidase)                                         | COM               | P32722.1 |
| 18     | NODE_10_length_241591_cov_199.467996_141 | Porin D (Ser-peptidase)                                         | COM               | P32722.1 |
| 19     | NODE_13_length_202268_cov_195.422540_66  | Alkaline phosphatase isozyme conversion prot (metallopeptidase) | COM-PER           | P10423.1 |
| 20     | NODE_20_length_68977_cov_198.681016_28   | Porin D (Ser-peptidase)                                         | COM               | P32722.1 |
| 21     | NODE_1_length_899382_cov_187.066277_523  | Murein DD-endopeptidase MepH (Cys-type endopeptidase)           | CW                | P76190.1 |
| 22     | NODE_1_length_899382_cov_187.066277_524  | Murein DD-endopeptidase MepH (Cys-type endopeptidase)           | CW                | P76190.1 |
| 23     | NODE_2_length_679634_cov_194.253327_604  | Murein DD-endopeptidase MepH (Cys-type peptidase)               | CW                | P76190.1 |
| 24     | NODE_3_length_664803_cov_198.377296_231  | Lipoprotein NlpD/LppB homolog (metalloendopeptidase)            | CW                | P45682.1 |
| 25     | NODE_3_length_664803_cov_198.377296_480  | Zinc D-Ala-D-Ala carboxypeptidase (metallopeptidase)            | CW                | P00733.2 |
