# Supplementary material for: Biodegradation of Pine Processionary Caterpillar Silk Is Mediated by Elastase- and Subtilisin-like Proteases
Source: MDPI journal article supplement (doi:10.3390/ijms232315253), 2022-12-03
Supplement: s1 [file s1]

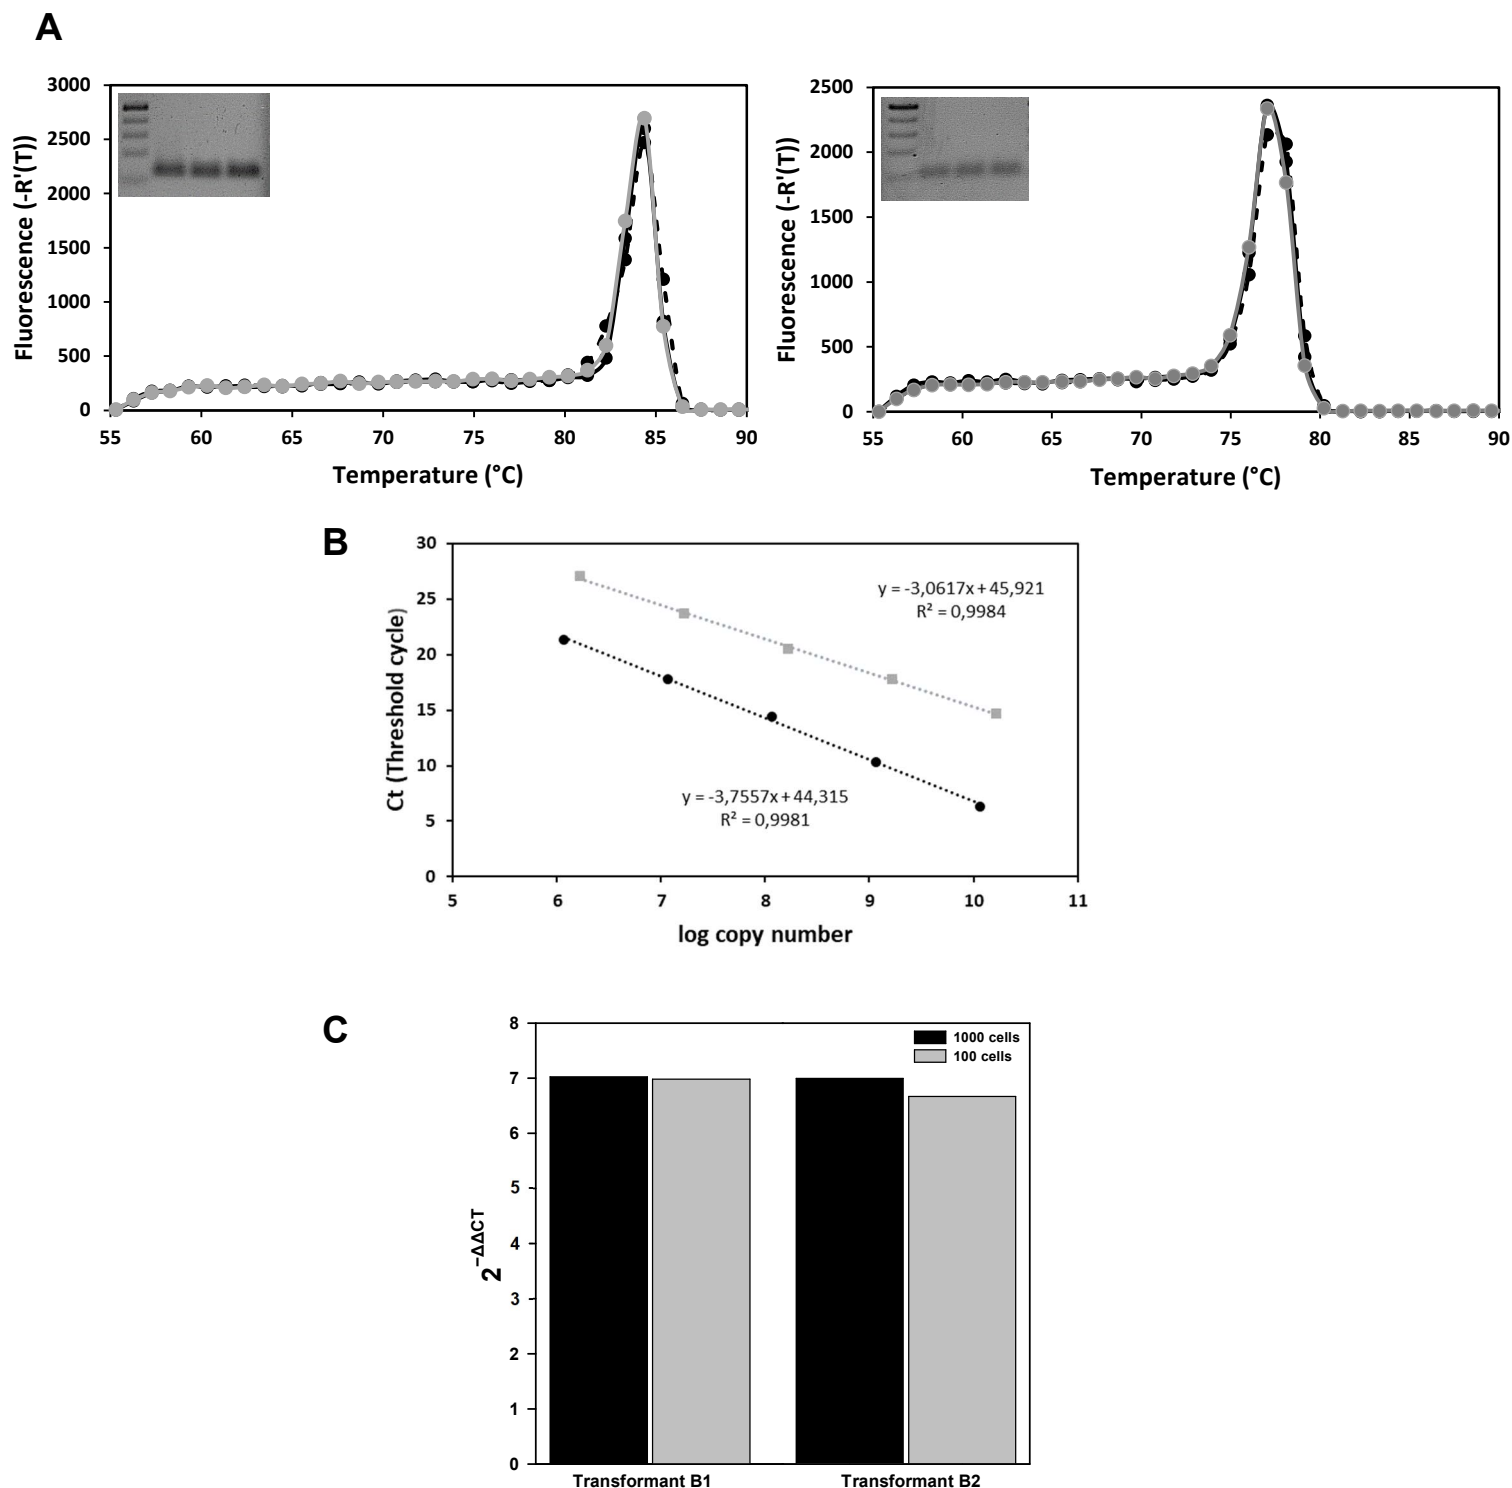

**Figure S2. Determination of *subC* gene copy number in *B. licheniformis* IIVV-SD3 B1 and B2 transformants carrying the recombinant plasmid pHY300PLK-*subC*.** (A). Confirmation of the specificity of gene amplification of the *subC* (left) and *rpoB* (right) genes by Real-Time PCR. Melting peaks were examined for the *subC* and the *rpoB* products amplified with a quantitative standard PCR fragment sample (dashed line), total DNA from *B. licheniformis* WT (solid black line) and total DNA from *B. licheniformis* pHY300PLK-*subC* transformant (solid gray line). Gel electrophoresis of the PCR products was performed on 1% agarose gel. Melting temperatures and amplicon sizes were 84°C and 70 bp for *subC*, and 77.5°C and 100 bp for *rpoB* genes, respectively. Identity of the amplified products was confirmed by DNA sequencing analysis. (B). qPCR standard curves for *subC* (black) and *rpoB* (gray) gene quantification. (C). *subC* gene copy number normalized to that of the single copy gene *rpoB* in the B1 and B2 transformants as determined by the  $2^{-\Delta\Delta CT}$  calculation
