# Supplementary material for: Biodegradation of Pine Processionary Caterpillar Silk Is Mediated by Elastase- and Subtilisin-like Proteases
Source: MDPI journal article supplement (doi:10.3390/ijms232315253), 2022-12-03
Supplement: s1 [file s1]

**Supplementary Material. Table S2.** Nucleotide and amino acid sequences of subtilisin Carlsberg (SubC) protein from *B. licheniformis* IIVV-SD3 and elastase (LasB) protein from *P. aeruginosa* IIVV-SD1 strains involved in the biodegradation of pine processionary raw silk. All the sequences can be found at DDBJ/ENA/GenBank (Bioproject ID PRJNA894474) that includes the *B. licheniformis* genome project (accession number JAPDGT000000000) and the *P. aeruginosa* genome project (accession number JAPDGT000000000)

| Bacterial strain                                                   | Gene nucleotide sequence                                                                                                                                                                                                                                                                                                                                                                                                                                                                                                                                                                                                                                                                                                                                                                                                                                                                                                                                                                                                                                                                                                                                                                                                                                                                                                                                                                                                                                                                                                                                                                                                                     | Protein amino acid sequence                                                                                                                                                                                                                                                                                                                                                                                                                                                                                                                        |
|--------------------------------------------------------------------|----------------------------------------------------------------------------------------------------------------------------------------------------------------------------------------------------------------------------------------------------------------------------------------------------------------------------------------------------------------------------------------------------------------------------------------------------------------------------------------------------------------------------------------------------------------------------------------------------------------------------------------------------------------------------------------------------------------------------------------------------------------------------------------------------------------------------------------------------------------------------------------------------------------------------------------------------------------------------------------------------------------------------------------------------------------------------------------------------------------------------------------------------------------------------------------------------------------------------------------------------------------------------------------------------------------------------------------------------------------------------------------------------------------------------------------------------------------------------------------------------------------------------------------------------------------------------------------------------------------------------------------------|----------------------------------------------------------------------------------------------------------------------------------------------------------------------------------------------------------------------------------------------------------------------------------------------------------------------------------------------------------------------------------------------------------------------------------------------------------------------------------------------------------------------------------------------------|
| <i>B. licheniformis</i> IIVV-SD3 <i>subC</i> gene and Subc protein | atgatgaggaagaggtttttggcttgggatgctgacggccttaatgctcgtgttcacg<br>atggcattcagcgattccgcttctgctgctcaaccggcgaaaaatgttgaaaaggattat<br>attgtcggatttaagtcaaggagtgaaccgcatctgtcaaaaaggacatcatcaagag<br>agcggcggaagtggaacaagcagtttagaatcatcaacggcgcaaaagcgaagctagac<br>aaagaagcgcttaaggaagtcaaaaatgatccggatgtcgcttatgttggaagaggatcat<br>gtggcccatgccttggcgcaaacggcttccttacggcattcctctcattaaagcggacaaa<br>gtgcaggctcaaggctttaaggggagcgaattgaagcgggaatcgagtcctggatcacaggaatc<br>caagcttctcatccggacttgaacgtagtcggcgaggacgaagctttgtggctggcggaagct<br>tataacaccgacggcaacggacacggcacacatgttgccggtacagtagctgcgcttgac<br>aatacaacgggtgtattagggcttgcgccaagcgatccttgtacgggttaaagtactg<br>aattcaagcgaagcggtatcacacggcgttgaagcgggaatcgagtcggcgacaaca<br>aacggcatggatgttatcaatatgagccttgggggagcatcaggctcgacagcgatgaaa<br>caggcagtcgacaatgcatatgcaagaggggttgtcgctttagctgcagcagggaacagc<br>ggatcttcaggaaacacgaatacaattgggtatcctgcgaaatacagattctgtcatcgct<br>gttggtgcggtagactctaacagcaacagagcttcattttccagtggtggagcagagctt<br>gaagtcattggctcctggcgaggcgtatacagcacttaccacgaacacttatgcaaca<br>ttgaacggaacgtcaatggcttctcctcatgtagcgggagcagcagctttgatcttgta<br>aaacatccgaacctttcagcttcacaagtcggcaaccgctctctccagcagcgagcttat<br>ttgggaagctccttctactatgggaaaggctctgatcaatgtcgaagctgccgctcaataa                                                                                                                                                                                                                                                                                                                                                                                  | MMRKKSFWLGLMLTALMLVFTMAFSDSASAAQPAKNVEKDYIVGFKSGVKT<br>ASVKKDI IKESGGKVDKQFRI INAAKAKLDKEALKEVKNDPDVAYVEEDH<br>VAHALAQTPYGIPLIKADKVQAQGFKGANVKVAVLDTGIQASHPDLNVV<br>GGASFVAGEAYNTDGNHGHGTHVAGTVAALDNTTGVLGVPSPVSLYAVKVL<br>NSSGSGSYSGIVSGIEWATTNGMDVINMSLGASGSTAMKQAVDNAYARG<br>VVVVAAGNSGSSGNTNTIGYPAKYDSVIAVGAVDSSNSNRSFSSVGAEL<br>EVMAPGAGVYSTYPTNTYATLNGTSMASPHVAGAAALILSKHPNLSASQV<br>RNRLSSTATYLGSSFYYGKGLINVEAAAQ                                                                                                                           |
| <i>P. aeruginosa</i> IIVV-SD1 <i>lasB</i> gene and LasB protein    | atgaagaagggttttctacgcttgacgtgttggcttgcgatcatgggtgttttcgccggcc<br>gcttttggccggcagcctgatcgacgtgtccaaactcccagcaaggctgccaggggcgcg<br>cccgcccggtcaccttgcaagccggtcggtcggtcggtgcgacgaactgaaagcg<br>atccgcagcagcaccctgcccaacggcaagcaggtcaccgctacgagcaattccacaac<br>ggcgtagcgggtggtcgggcaagccatcacggaagtcaagggtcccggaagagcgtggcg<br>gcgtagcgcagcgccatttcgtcgccaacatcgctgccgacctgccgggcagcaccacc<br>gcggcggtatccgcccagcaggtgctggcccagccaaagacctgaaggcccaggggccgc<br>aagaccgagaatgacaaagtggaactggtgatccgctggcgagaaacaacatcgcccaa<br>ctggtctacaacgtctcctacctgattcccgcgagggaactgtcgcgccgcatcttctgc<br>atcgacgccaagaccggcggaagtgtcgatcagtgagggaaggcctggcccacgcccaggcg<br>ggcgcccccgggcgaaccagaagatcggaagtaacacctacggtagcgactacggtccg<br>ctgatcgtcaacgaccgctgcgagatggacgacggcaacgtcatcacgctcgacatgaac<br>ggcagcaccgacgacagcaagaccagcgcttccgcttcgctgcccgaccacaacacctac<br>aagcaggtcaacggcgccctattccgctgtaacgacgcgcatttcttcggcgcggtgtg<br>ttcaaaactgtaccgggactggttcggcaccagcccgctgaccacaagctgtacatgaag<br>gtgactactcgggcgagcgtggagaacgcctactgggacggcagcgcatgctcttcggc<br>gacggcgccaccatgttctatccgctggtgtcgctggaagctggcgccacagaggtcagc<br>cacggctttaccgagcagaactccgggtgatctaccgcggaatcaggcggaatgaac<br>gaagcgttctccgacatggccggcgaggcagccaggttctacatgcgcggcaagaacgac<br>ttcctgatcggtacgacatcaagaaggcgagcggtgcgctgcgctacatggaccagccc<br>agccgagcggggcgtccatcgacaacgcgtcgagtagtacaacggcatcgacgtgcac<br>cactccagcgcggtgtacaacgcgtgcgttctacctgttgcccaattcgccgggctgggat<br>acccgcaaggccttcgaggtgttcgtcgacgccaaccgctactactggaccgccaccagc<br>aactacaacagcgcgctgcggggtgattcgctcggcgcagaaaccgcaactactcgcg<br>gctgacgtcaccggcggttcagcaccgctcgcggtgacctgcccgagcgcggtgtgtaa | MKKVSTLDLLFVAIMGVSPAFAADLIDVSKLPSKAAQAGPVTLQAAV<br>GAGGADELKAIRSTTLPNGKQVTRYEQFHNGVRVVGEAITEVKGPKSV<br>AQRSGHFVANIAADLPGSTTAAVSAEQVLAQAKSLKAQGRKTENDKVELV<br>IRLGENNIAQLVYNVSYLIPGGLSRPHFVIDAKTGEVLDQWEGLAHA<br>EAGPGGNQKIGKITYGSDYGPLIVNDRCEMDGNVITVDMNGSTDDSKTTP<br>FRFACPTNTYKQVNGAYSPLNDAHFFGGVVFKLYRDWFGTSPLTHKLYMK<br>VHYGRSVENAYWDGTAMLFGDGATMFYPLVSLDVAHEVSHGFTEQNSGL<br>IYRGQSGGMNEAFSDMAGEAAEFYMRGKNDFLIGYDIKKGSGALRYMDQP<br>SRDGRSIDNASQYYNGIDVHHSSGVYNRAFYLLANS PGWDTRKAFEFVVD<br>ANRYYTATSNTYNSGACGVIRSAQNRNYSAADVTRAFSTVGVTCP<br>SAL |
